# Supplementary material
Source: ML conference proceedings conference paper supplement (https://proceedings.neurips.cc/paper_files/paper/2019/hash/6084e82a08cb979cf75ae28aed37ecd4-Abstract.html)
Supplement: Supplementary file 1 [file 6084e82a08cb979cf75ae28aed37ecd4-Supplemental.zip]

All supplementary material is available in this link to arxiv:

<https://arxiv.org/abs/1903.06904>
